# Supplementary material
Source: PubMed Central journal article supplement (PMC9197513)
Supplement: NIHMS1812052-supplement-1.pdf [file NIHMS1812052-supplement-1.pdf]

**Supplemental Methods:**

The following demographic and clinical data was collected and managed using REDCap (Research Electronic Data Capture): age, gender, race, menopausal status, etiology of NGB, catheterization regimen, prophylactic antibiotic use (including gentamicin bladder irrigations), estrogen use, cranberry use, methenamine use, intradetrusor botulinum toxin A (BTX-A) treatment, surgical history including bladder augmentation, urodynamic results, upper tract imaging, and UTI history in the past 12 months prior to study visit.

**Supplemental Figure:**

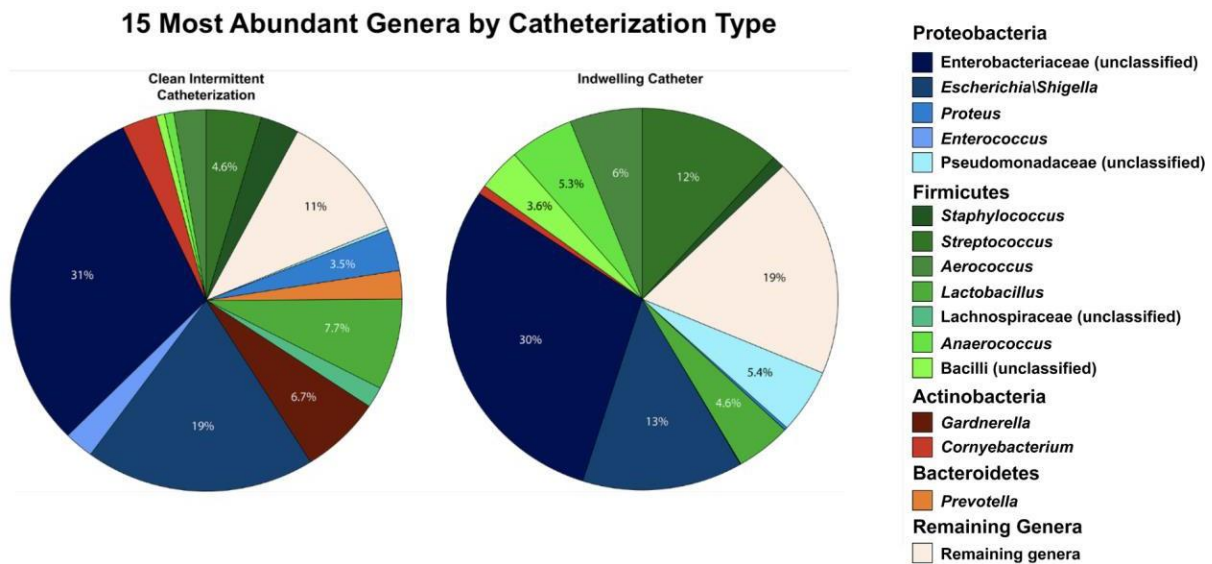

**Supplemental Table:** Clinical and demographic distinctions based on subgroups of interest, tables not shown

|                                     | Intermittent<br>Catheterization (CIC)<br>(n=76) | Indwelling<br>Catheter Use<br>(n=18) | p      |
|-------------------------------------|-------------------------------------------------|--------------------------------------|--------|
| <b>Age (mean, SD)</b>               | 53.4 (16.4)                                     | 65.6 (14.8)                          | 0.006  |
| <b>Gender - Female</b>              | 42 (55%)                                        | 9 (50%)                              | 0.69   |
| <b>Race</b>                         |                                                 |                                      | 0.35   |
| Caucasian                           | 64 (84%)                                        | 18 (100%)                            |        |
| Asian                               | 2 (3%)                                          | 0 (0%)                               |        |
| African American                    | 3 (4%)                                          | 0 (0%)                               |        |
| Unknown                             | 7 (9%)                                          | 0 (0%)                               |        |
| <b>BMI (mean, SD)</b>               | 27.1 (.72)                                      | 34.5 (11.4)                          | <0.001 |
| <b>Cause of Neurogenic Bladder</b>  |                                                 |                                      | 0.26   |
| Spinal cord injury                  | 37 (49%)                                        | 6 (33%)                              |        |
| Multiple sclerosis                  | 10 (13%)                                        | 1 (6%)                               |        |
| Myelomeningocele                    | 5 (7%)                                          | 0 (0%)                               |        |
| Non-neurogenic urinary retention    | 6 (8%)                                          | 3 (17%)                              |        |
| Other                               | 21 (28%)                                        | 9 (50%)                              |        |
| <b>3 or more UTI over 12 months</b> |                                                 |                                      | 0.58   |
| Yes                                 | 16 (21%)                                        | 6 (33%)                              |        |
| Missing                             | 23 (30%)                                        | 2 (11%)                              |        |
| <b>Antibiotic Prophylaxis</b>       |                                                 |                                      | 0.41   |
| Daily oral prophylaxis              | 5 (7%)                                          | 2 (11%)                              |        |
| Gentamicin bladder irrigation       | 27 (36%)                                        | 3 (17%)                              |        |
| None                                | 43 (57%)                                        | 13 (72%)                             |        |
| Both                                | 1 (1%)                                          | 0 (0%)                               |        |
| <b>Non-Antibiotic Prophylaxis*</b>  |                                                 |                                      |        |
| Cranberry                           | 9 (12%)                                         | 2 (11%)                              | 0.93   |
| D-mannose                           | 2 (3%)                                          | 1 (6%)                               | 0.53   |
| Methanamine                         | 6 (8%)                                          | 1 (6%)                               | 0.73   |
| Probiotics                          | 8 (11%)                                         | 0 (0%)                               | 0.15   |

|                          |          |         |       |
|--------------------------|----------|---------|-------|
| Vaginal Estrogen         | 2 (3%)   | 0 (0%)  | 0.49  |
| <b>Bladder BTX-A Use</b> | 42 (55%) | 4 (22%) | 0.012 |

Additional clinical and demographic distinctions based on subgroups of interest (tables not shown)

### **Gender (male versus female)**

- Women tended to be older than men (59 vs 52, p=0.04)

### **Use of antibiotic prophylaxis (oral versus gentamicin irrigations versus none)**

- There were no clinical or demographic differences based on use of antibiotic prophylaxis.

### **UTI frequency ( $\geq 3$ versus $< 3$ per year)**

- Those with three or more UTI per year were more often patients with a history of spinal cord injury versus not (73% vs 34%, p=0.03) and were younger (47 vs 59, p=0.01).

### **BTX-A treatment versus not.**

- BTX-A users were more often patients with SCI (61% vs 31%, p=0.02) and were younger (52 vs 59, p=0.04) than non-BTX-A users
